# Supplementary material for: Effects of stent generation on clinical outcomes after acute myocardial infarction compared between prediabetes and diabetes patients
Source: PubMed Central journal article supplement (PMC8087777; doi:10.1038/s41598-021-88593-x), 2021-04-30

**A**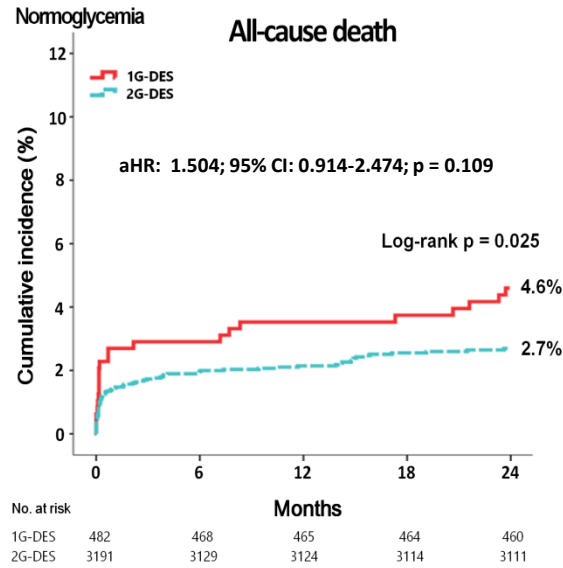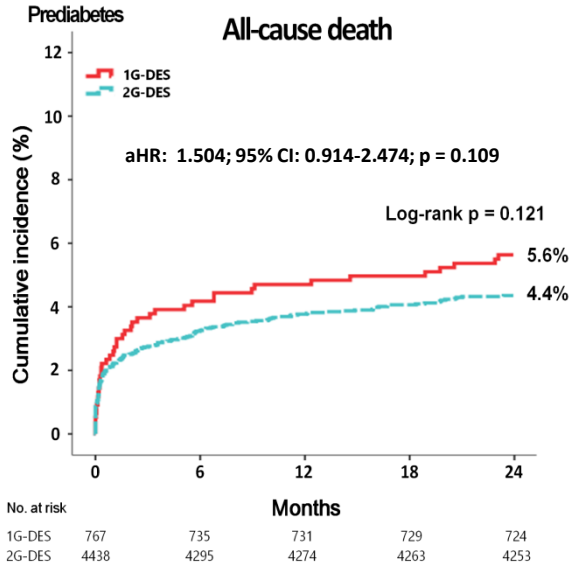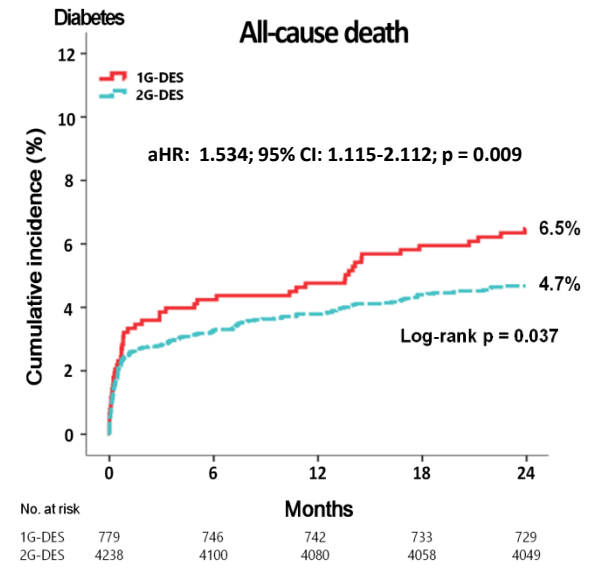**B**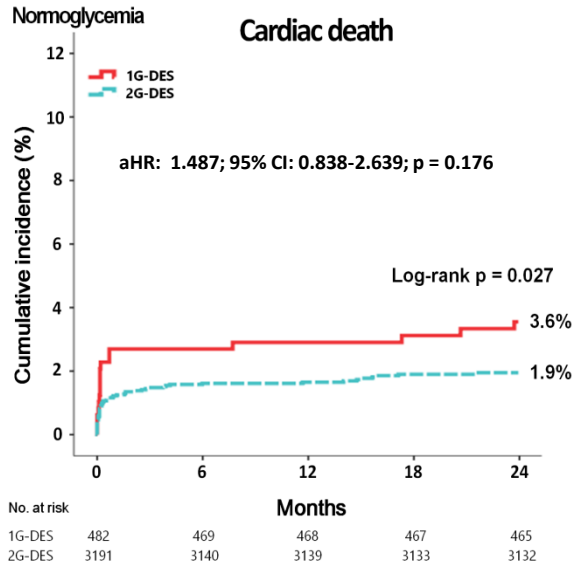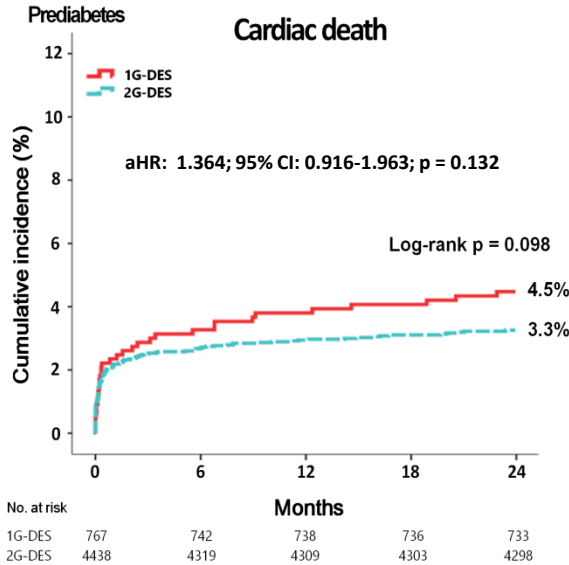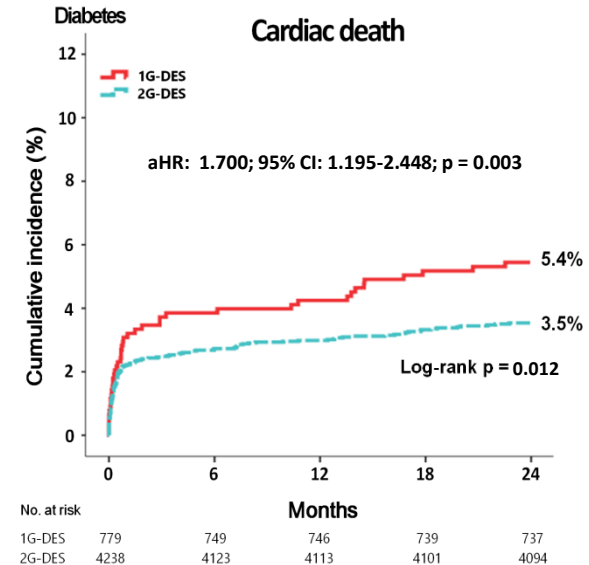

**Supplementary Information 1.** Kaplan-Meier analysis of the incidences of all-cause death (A), cardiac death (B), Re-MI (C), all-cause death and MI (D), any repeat revascularization (E), and stent thrombosis (F). Re-MI, recurrent myocardial infarction; 1G, first-generation; 2G, second-generation; DES, drug-eluting stent; aHR, adjusted hazard ratio.

**C**

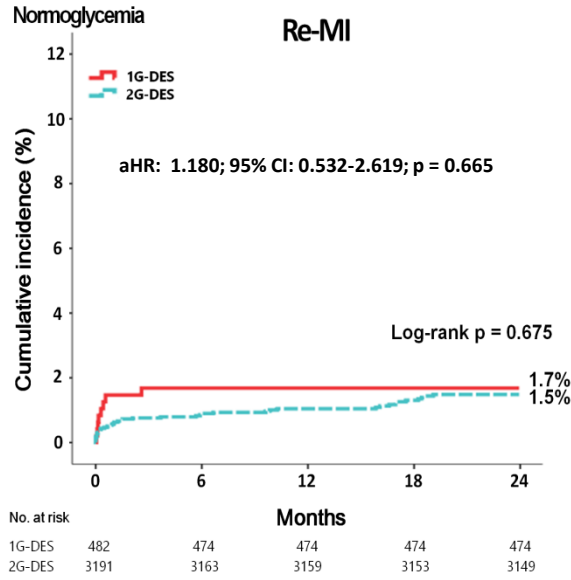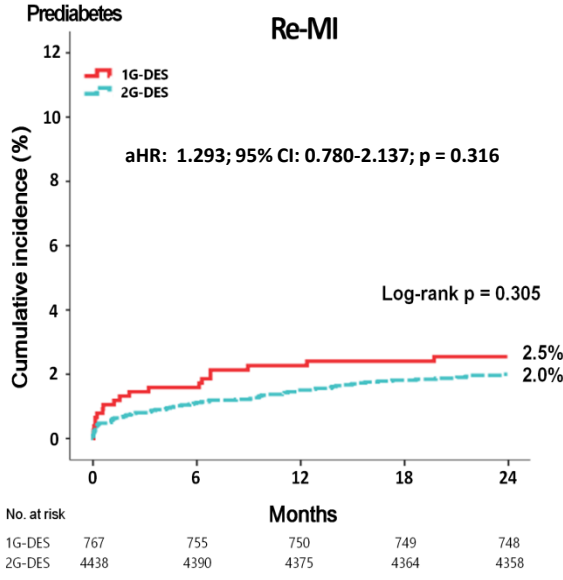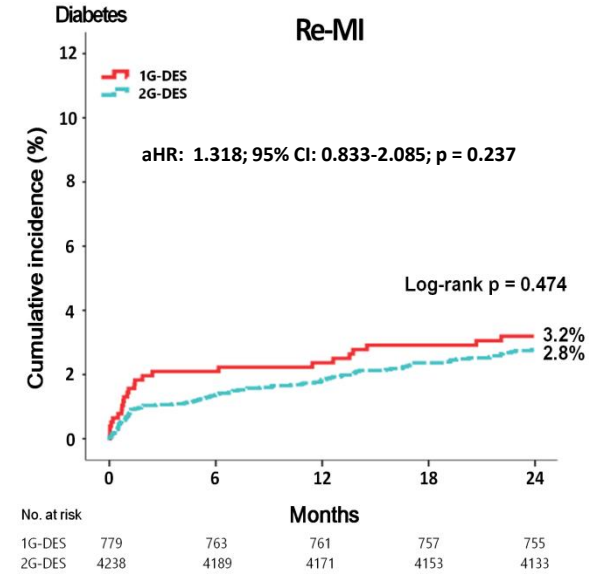

**D**

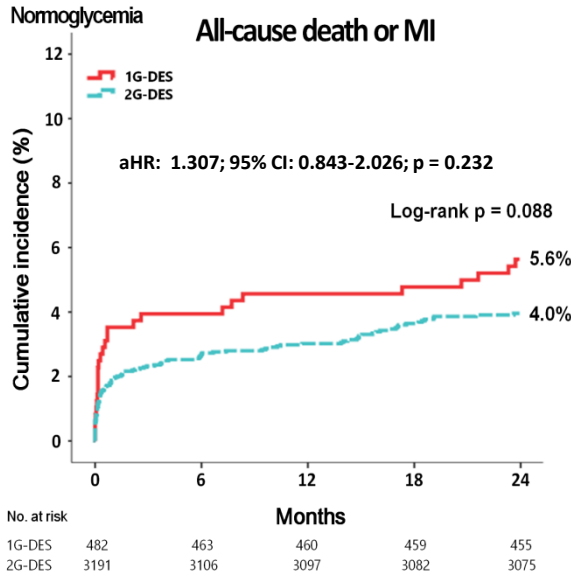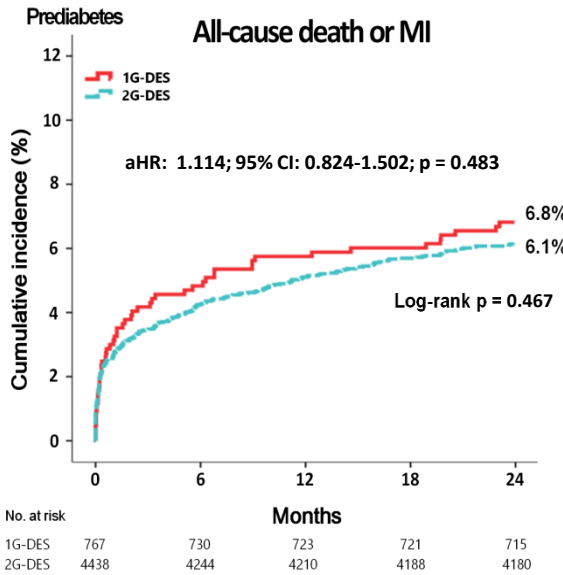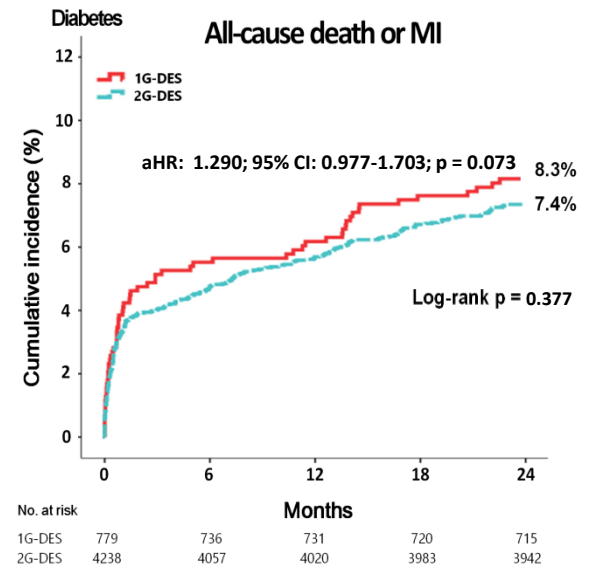

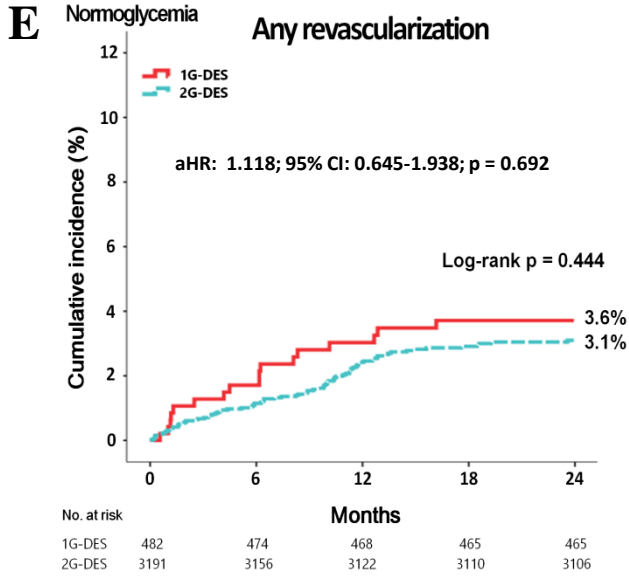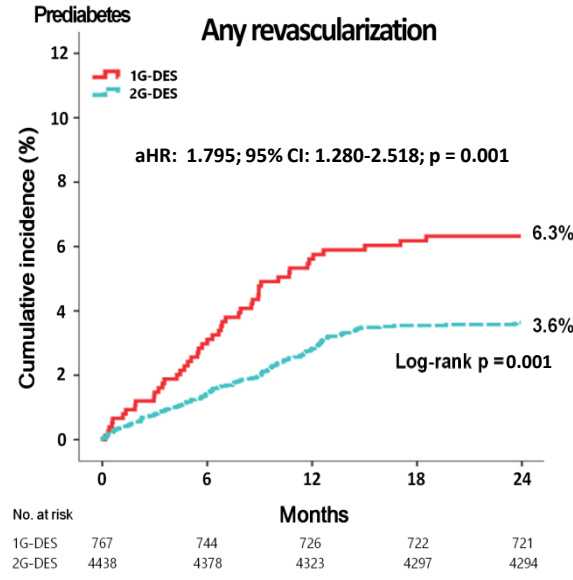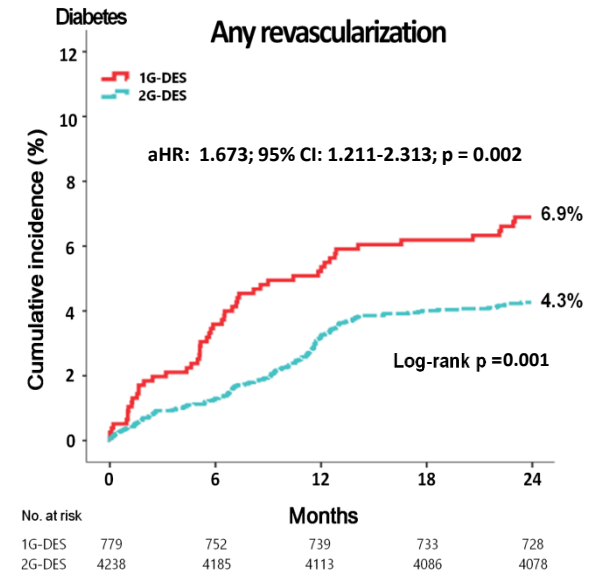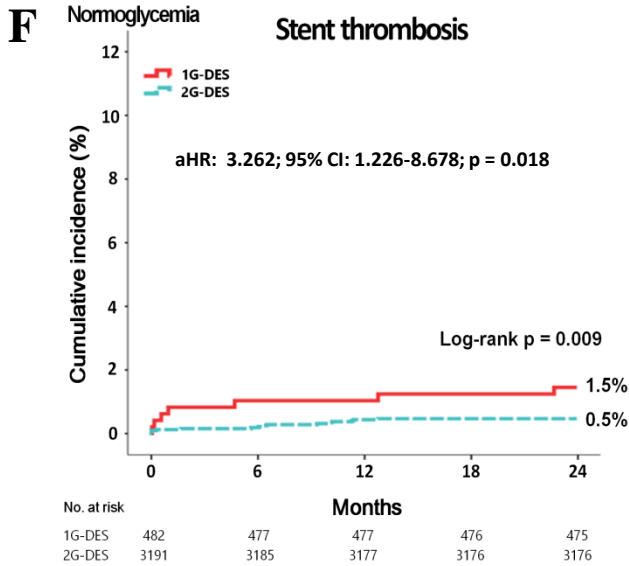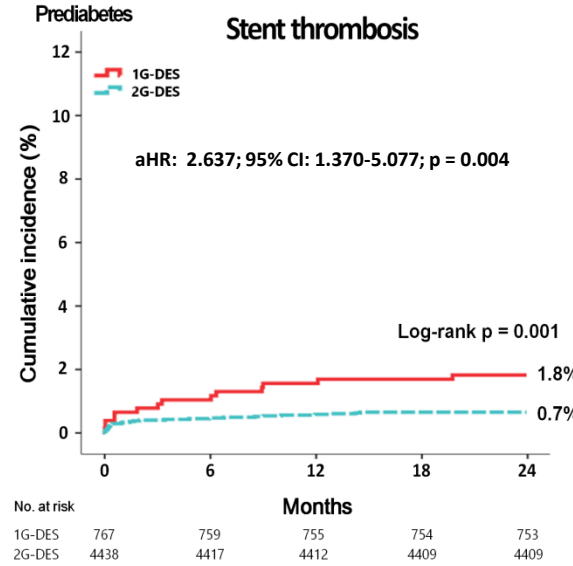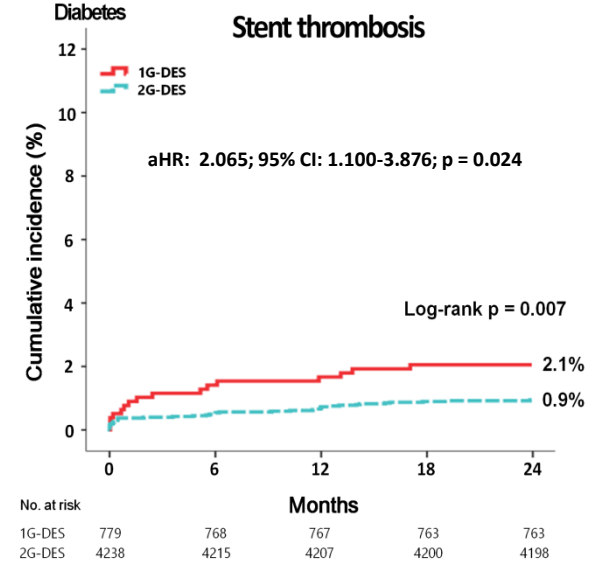

Supplement: 41598_2021_88593_MOESM1_ESM.pdf [file 41598_2021_88593_MOESM1_ESM.pdf]
